# Supplementary material for: Visible-light photocatalytic performance, recovery and degradation mechanism of ternary magnetic Fe3O4/BiOBr/BiOI composite
Source: Royal Society of Chemistry journal article supplement (doi:10.1039/c9ra04412d), 2019-01-01
Supplement: c9ra04412d1.pdf [file c9ra04412d1.pdf]

## Supplementary Material

### Visible-light photocatalytic performance, recovery and degradation mechanism of ternary magnetic Fe<sub>3</sub>O<sub>4</sub>/BiOBr/BiOI composite

Jianhui Li, Fan Yang, Quan Zhou, LiJie Wu, Wenying Li, Ruipeng Ren\*, Yongkang Lv\*

Key Laboratory of Coal Science and Technology, Ministry of Education and Shanxi  
Province, Taiyuan University of Technology, No. 79 Yingze West Street, Taiyuan  
030024, China

\*Corresponding author. Mailing address for correspondence: No. 79 Yingze West  
Street, Taiyuan 030024, China. E-mail address: [renruipeng888@126.com](mailto:renruipeng888@126.com) (R.P. Ren);  
[yongkanglv@163.com](mailto:yongkanglv@163.com) (Y.K. Lv)

#### Fig. S1 and Table S1

Fig. S1

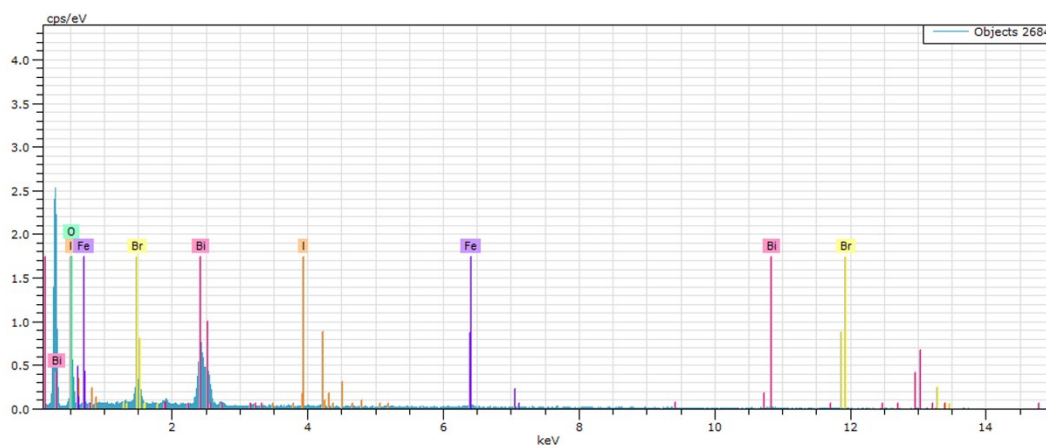

Fig. S1 EDS pattern of Fe<sub>3</sub>O<sub>4</sub>/BiOBr/BiOI (0.4:3:1).

**Table S1** Composition of metal elements in Fe<sub>3</sub>O<sub>4</sub>/BiOBr/BiOI (0.4:3:1).

| Sample                                               | Fe (mg/kg) | Bi (mg/kg) |
|------------------------------------------------------|------------|------------|
| Fe <sub>3</sub> O <sub>4</sub> /BiOBr/BiOI (0.4:3:1) | 49761.7    | 671821.2   |

ICP-AES: Inductively couple plasma atomic emission spectroscopy.
